# Supplementary material for: Single-cell lineage tracing by endogenous mutations enriched in transposase accessible mitochondrial DNA
Source: eLife journal article supplement (doi:10.7554/elife.45105), 2019-04-08
Supplement: supp [file elife-45105-supp-v1.zip]

Archive with 13 entries (13 files):
- elife_poa_e45105_Supplementary_file_1.xlsx
- elife_poa_e45105_Figure_2_figure_supplement_1.pdf
- elife_poa_e45105_Supplementary_file_2.xlsx
- elife_poa_e45105_Figure_1_figure_supplement_1.pdf
- elife_poa_e45105_Supplementary_file_3.xlsx
- elife_poa_e45105_Figure_1_figure_supplement_2.pdf
- elife_poa_e45105_Figure_1_figure_supplement_4.pdf
- elife_poa_e45105_Figure_2_figure_supplement_3.pdf
- elife_poa_e45105_Figure_1_figure_supplement_5.pdf
- elife_poa_e45105_Figure_2_figure_supplement_4.pdf
- elife_poa_e45105_Figure_2_figure_supplement_2.pdf
- elife_poa_e45105_Figure_1_figure_supplement_3.pdf
- elife_poa_e45105_Transparent_Reporting_File.docx
