# Supplementary material for: Single-cell lineage tracing by endogenous mutations enriched in transposase accessible mitochondrial DNA
Source: eLife journal article supplement (doi:10.7554/elife.45105), 2019-04-08
Supplement: supp [file elife-45105-supp-v1.zip › elife_poa_e45105_Supplementary_file_1.xlsx]

## Sheet: Sheet1
Data Sets	Resource	Library preparation	Sequence platform	Number of cells/samples	organism	Cell type	Pubmed ID	Present in
GM12878_exome	phase 3 release of 1000 genomes	whole exome sequence	NA	NA	Homo sapiens	lymphoblast cell line	NA	Fig1B-E
GM12878_WGS_L	phase 3 release of 1000 genomes	Low coverage whole genome	NA	NA	Homo sapiens	lymphoblast cell line	NA	Fig1B-E
GM12878_WGS_h	phase 3 release of 1000 genomes	PCR free whole genome sequence	NA	NA	Homo sapiens	lymphoblast cell line	NA	Fig1B-E
GM12878_bulk_ATACseq	GEO(GSE47753)	Bulk ATAC-seq	Illumina HiSeq 2000	50K	Homo sapiens	lymphoblast cell line	PMID: 24097267	Fig1B-E
GM12878_sc_ATACseq	GEO(GSE65360)	single cell ATAC-seq,captured using the C1 Single-Cell Auto Prep IFC microfluidic chips.	Illumina MiSeq; Illumina NextSeq 500	384	Homo sapiens	lymphoblast cell line	PMID: 26083756	Fig1B-E
AML_bulk_ATAC-seq	GEO(GSE74912)	Bulk ATAC-seq	Illumina HiSeq 2500;Illumina NextSeq 500	15 cases with at least two cell types	Homo sapiens	leukemia stem cell, leukemia blast, pHSC from AML patients	PMID: 27526324	Fig2B-C
SU070_LSC_scATAC-seq	GEO(GSE74310;GSE122576)	single cell ATAC-seq,captured using the C1 Single-Cell Auto Prep IFC microfluidic chips.	Illumina NextSeq 500	96	Homo sapiens	leukemia stem cell from AML patient SU070	PMID: 27526324	Fig1F-H
SU070_Leuk_scATAC-seq	GEO(GSE74310;GSE122576)	single cell ATAC-seq,captured using the C1 Single-Cell Auto Prep IFC microfluidic chips.	Illumina NextSeq 500	96	Homo sapiens	leukemic blast from AML patient SU070	PMID: 27526324	Fig1F-H
SU353_LSC_scATAC-seq	GEO(GSE74310;GSE122576)	single cell ATAC-seq,captured using the C1 Single-Cell Auto Prep IFC microfluidic chips.	Illumina NextSeq 500	96	Homo sapiens	leukemia stem cell from AML patient SU353	PMID: 27526324	Fig1F-H;Fig2
SU353_Leuk_scATAC-seq	GEO(GSE74310;GSE122576)	single cell ATAC-seq,captured using the C1 Single-Cell Auto Prep IFC microfluidic chips.	Illumina NextSeq 500	96	Homo sapiens	leukemic blast from AML patient SU353	PMID: 27526324	Fig1F-H; Fig2
HSC_scATAC-seq	GEO(GSE96772)	single cell ATAC-seq,captured using the C1 Single-Cell Auto Prep IFC microfluidic chips.	Illumina NextSeq 500	288	Homo sapiens	Hematopoietic stem cell from normal donor (BM0106;BM1077)	PMID: 29706549	Fig2E-H
SU353_pHSC_scATAC-seq	GEO(GSE122577)	single cell ATAC-seq,captured using the C1 Single-Cell Auto Prep IFC microfluidic chips.	Illumina MiSeq	384	Homo sapiens	pre-leukemia hematopoietic stem cell from AML patient SU353	NA	Fig2D-H
K562_WGS	NECODE(ENCFF691CKS.bam )	whole genome sequence	NA	NA	Homo sapiens	chronic myeloid leukemia cell line		Fig1-S5
K562_ATAC	GSM1977058	Bulk ATAC-seq	Illumina NextSeq 500	50K	Homo sapiens	chronic myeloid leukemia cell line	PMC5259890	Fig1-S5
