# Supplementary material for: Single-cell lineage tracing by endogenous mutations enriched in transposase accessible mitochondrial DNA
Source: eLife journal article supplement (doi:10.7554/elife.45105), 2019-04-08
Supplement: supp [file elife-45105-supp-v1.zip › elife_poa_e45105_Supplementary_file_3.xlsx]

## Sheet: Sheet1
Markers	Sequnce methods	Cost	Cell ancestry	Cell fate
L1 retrotransposition	WGS/target sequencing	High/Low	√	×
CNV	WGS	High	√	×
SNV	WGS	High	√	×
	scRNA-seq	Low	√	√
	Target sequencing	Low	√	×
microsatellites	Target genotyping	Low	√	×
mtDNA	ATAC-seq	Low	√	√
