# Supplementary figures and images for: Single-cell lineage tracing by endogenous mutations enriched in transposase accessible mitochondrial DNA
Source: eLife journal article supplement (doi:10.7554/elife.45105), 2019-04-08

Figure2-S1

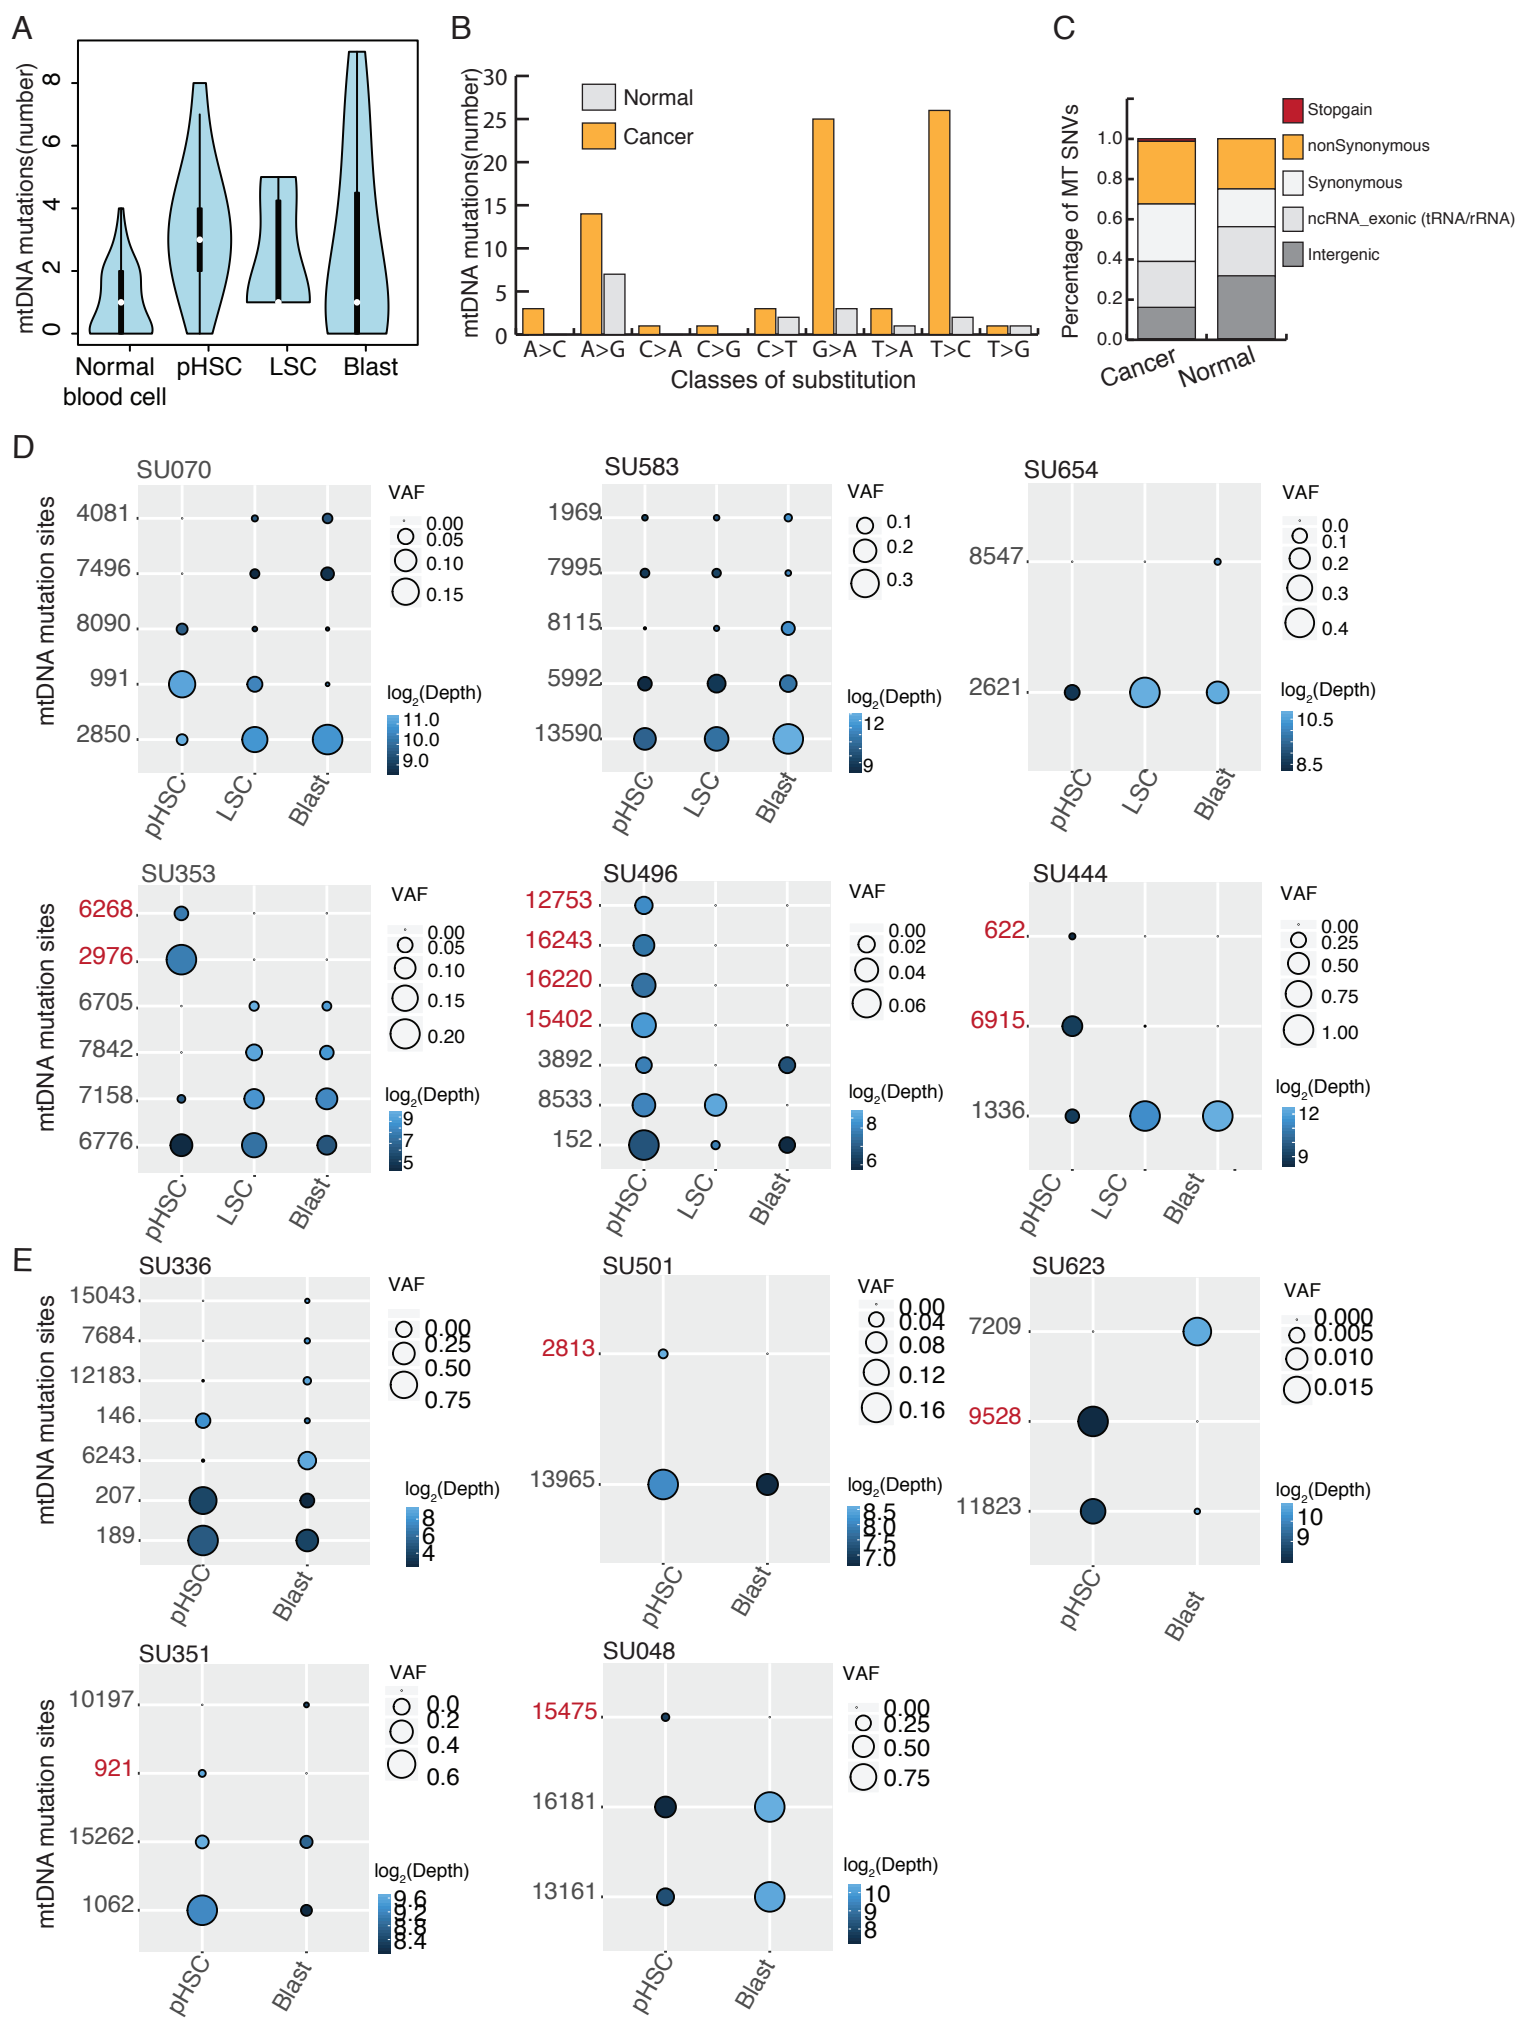

Supplement: supp [file elife-45105-supp-v1.zip › elife_poa_e45105_Figure_2_figure_supplement_1.pdf]

Figure 1-S1

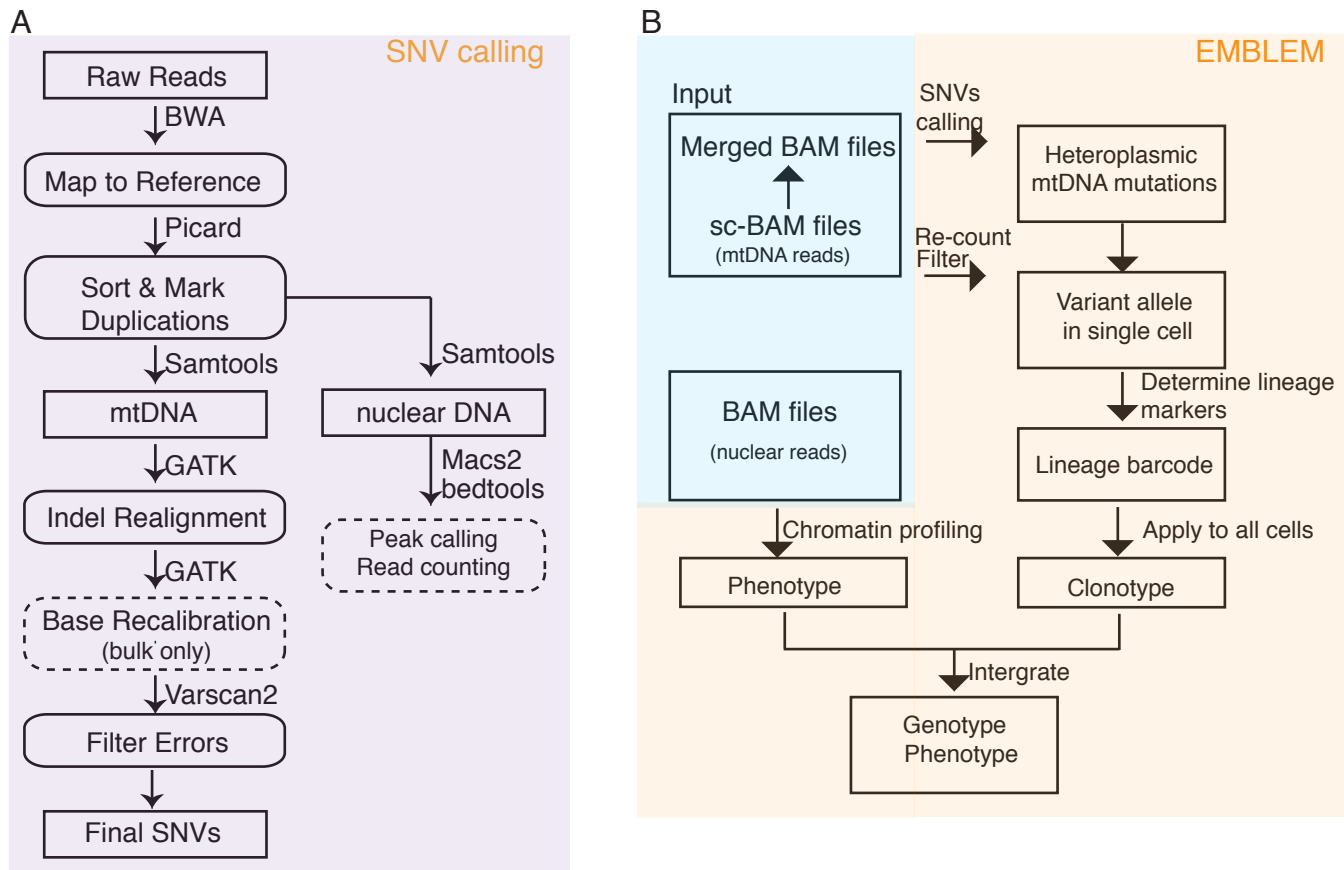

Supplement: supp [file elife-45105-supp-v1.zip › elife_poa_e45105_Figure_1_figure_supplement_1.pdf]

Figure 1-S2

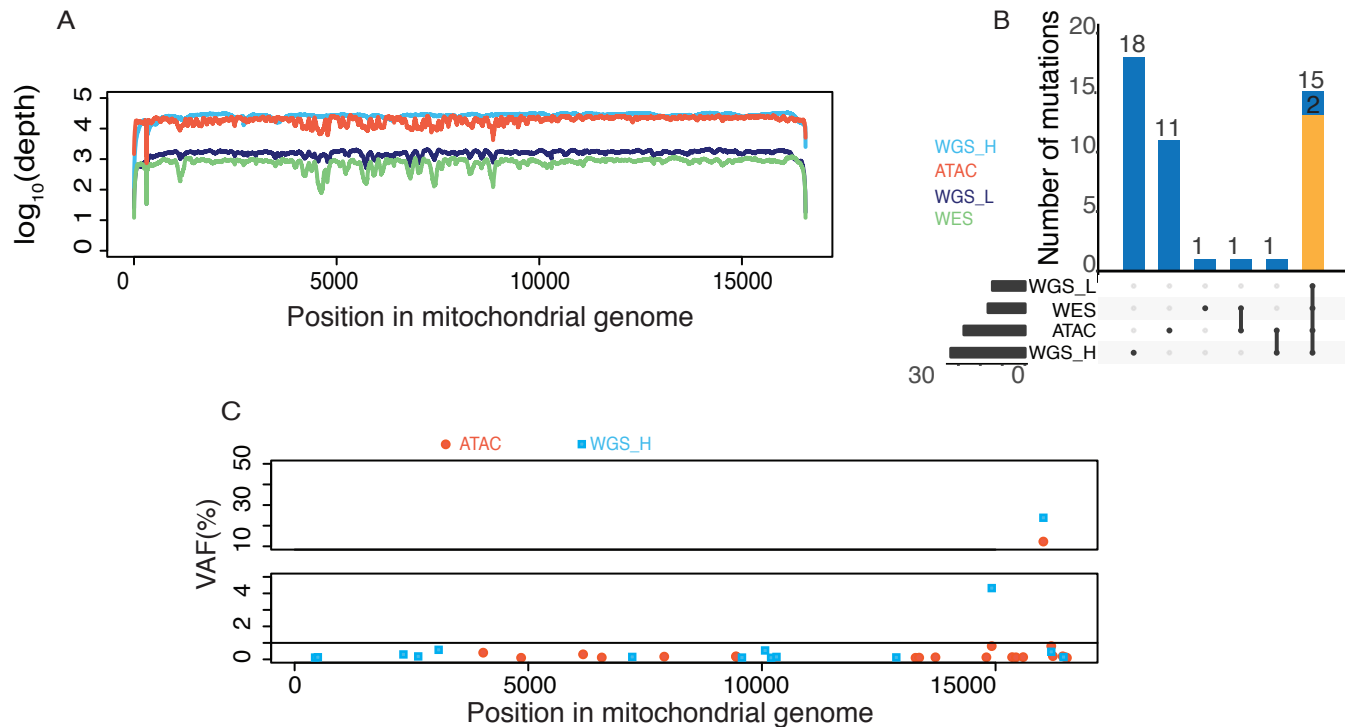

Supplement: supp [file elife-45105-supp-v1.zip › elife_poa_e45105_Figure_1_figure_supplement_2.pdf]

Figure1-S4

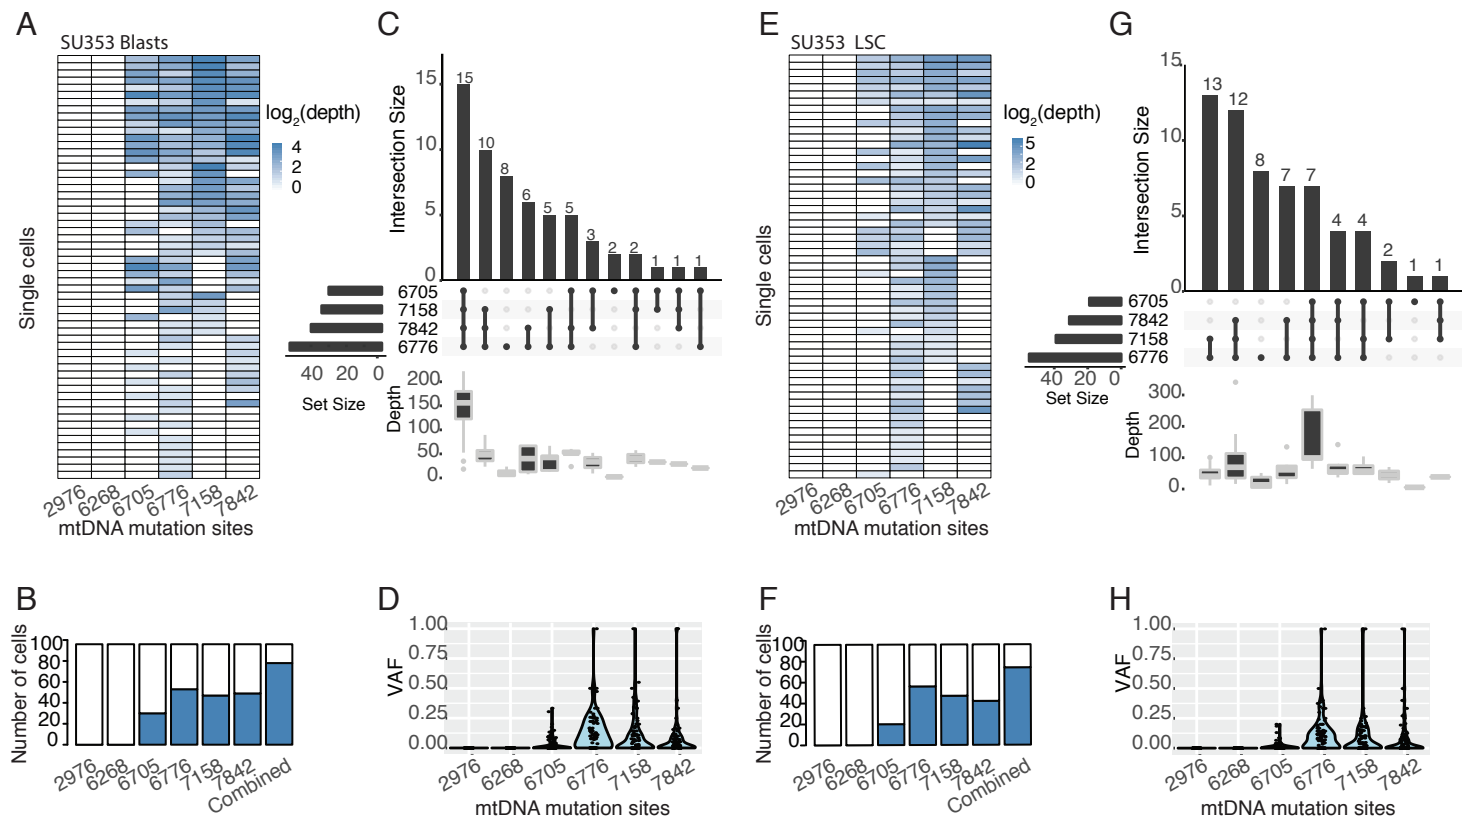

Supplement: supp [file elife-45105-supp-v1.zip › elife_poa_e45105_Figure_1_figure_supplement_4.pdf]

Figure2- S3

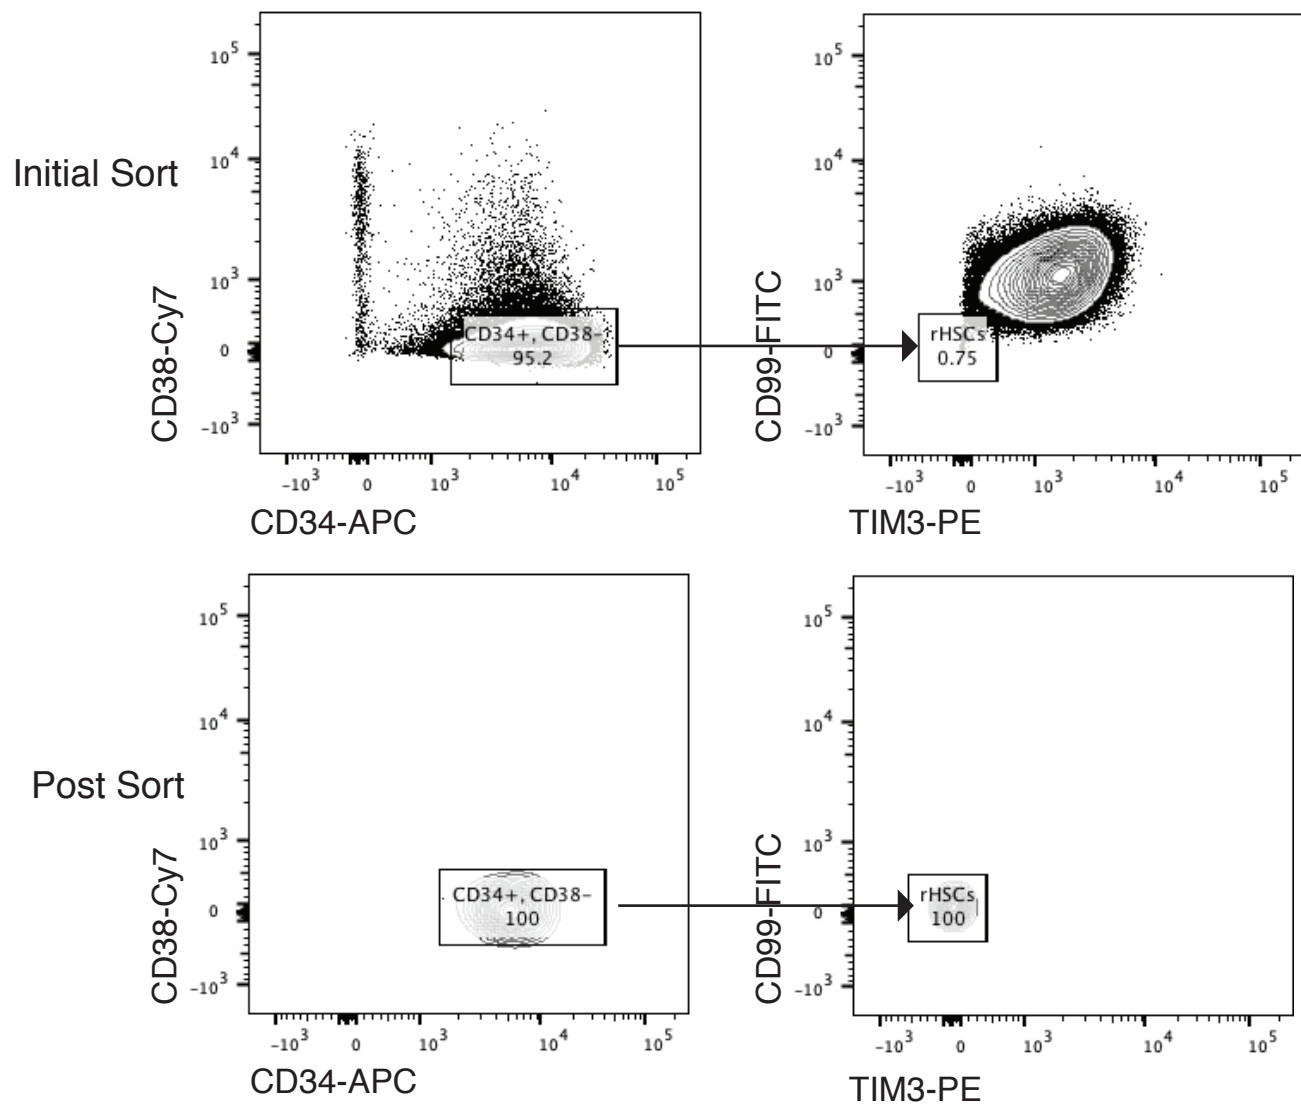

Supplement: supp [file elife-45105-supp-v1.zip › elife_poa_e45105_Figure_2_figure_supplement_3.pdf]

Figure1-S5

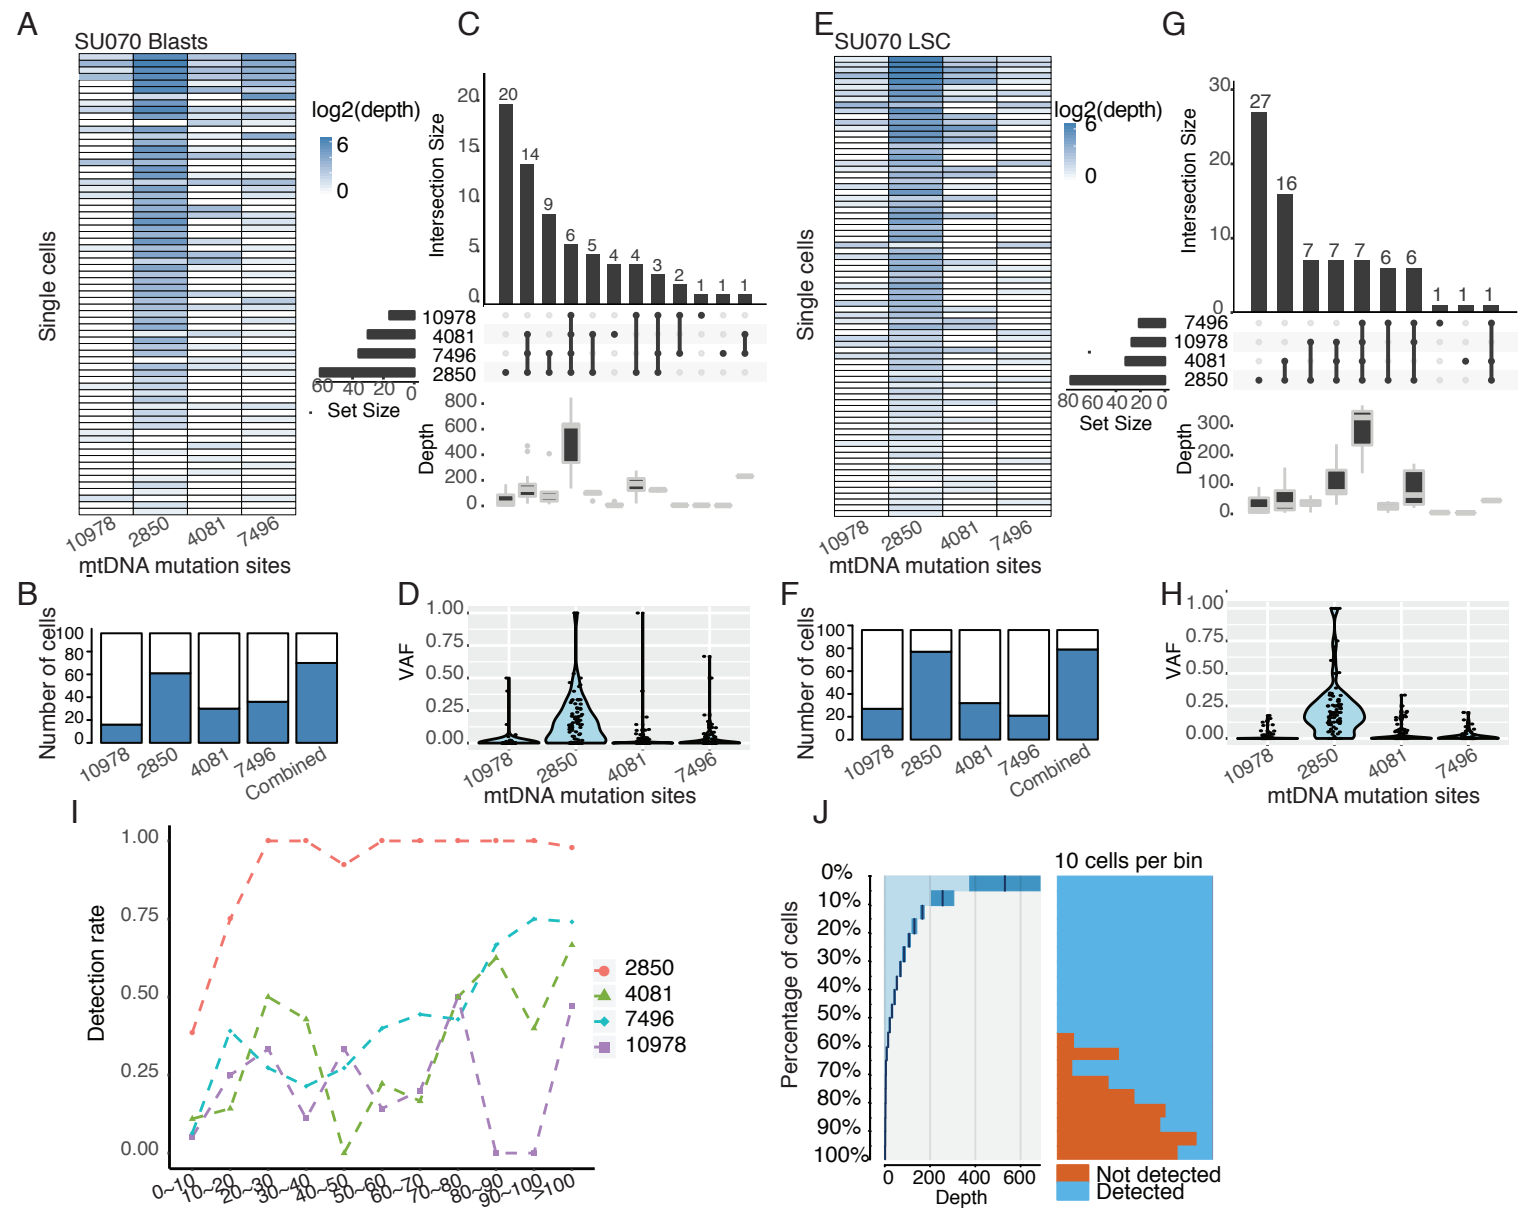

Supplement: supp [file elife-45105-supp-v1.zip › elife_poa_e45105_Figure_1_figure_supplement_5.pdf]

A

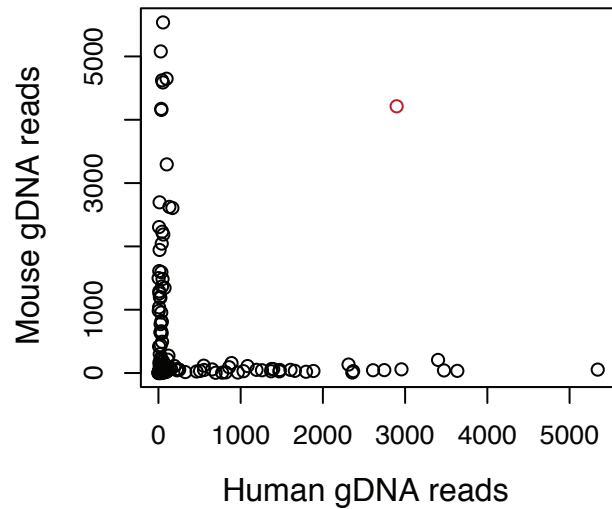

B

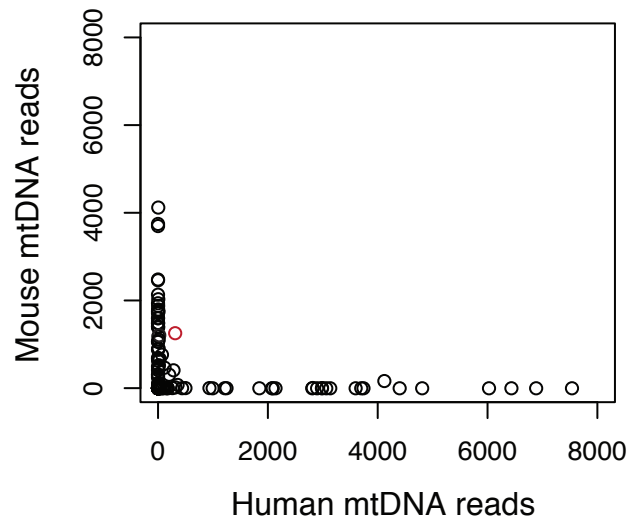

C

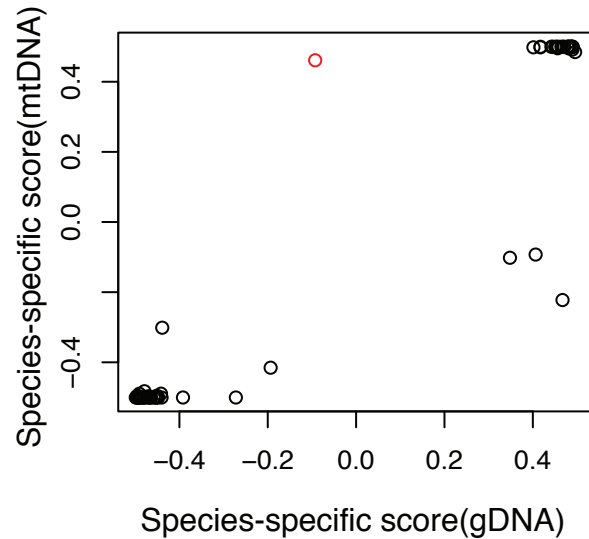

Supplement: supp [file elife-45105-supp-v1.zip › elife_poa_e45105_Figure_2_figure_supplement_4.pdf]

Figure2- S2

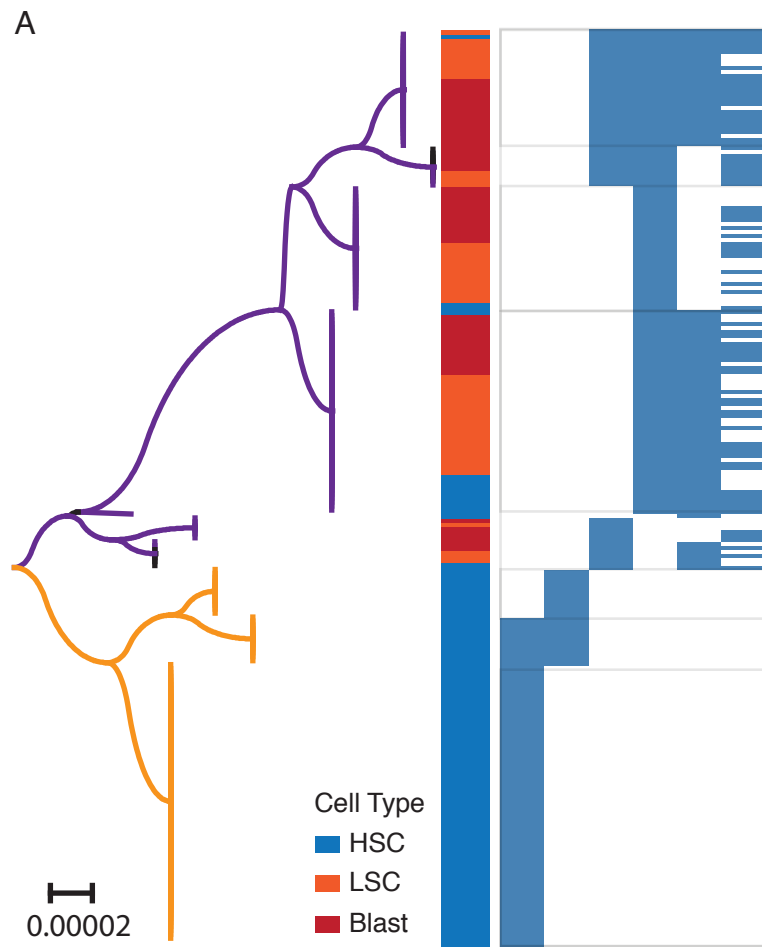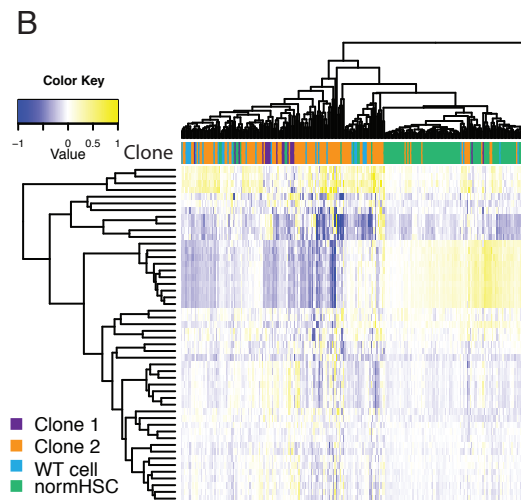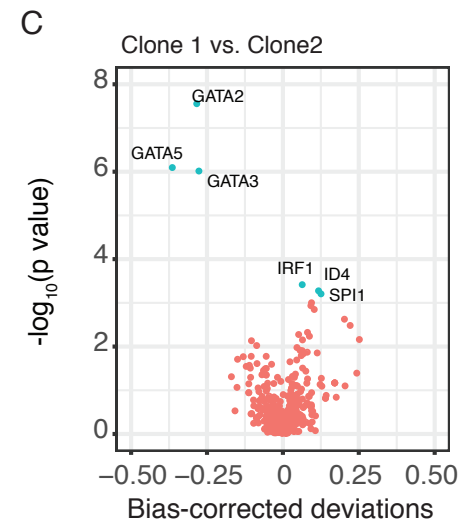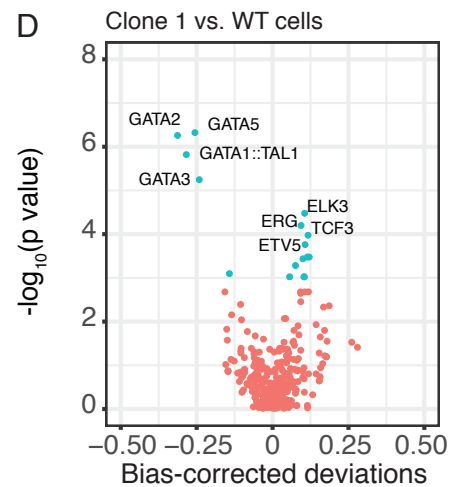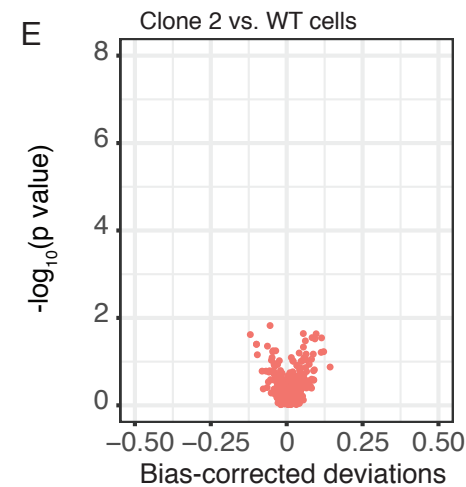

Supplement: supp [file elife-45105-supp-v1.zip › elife_poa_e45105_Figure_2_figure_supplement_2.pdf]

Figure 1-S3

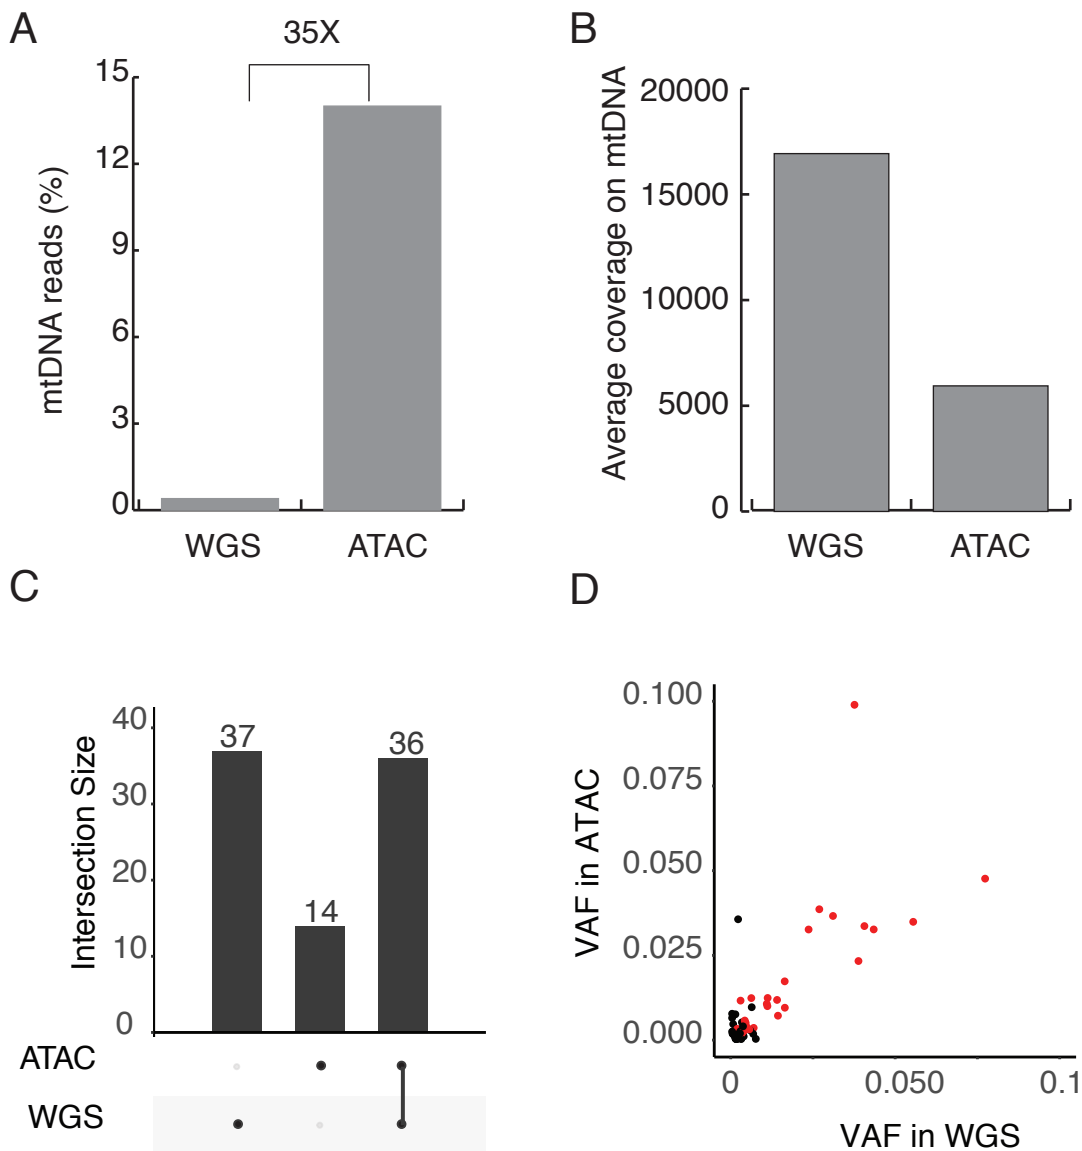

Supplement: supp [file elife-45105-supp-v1.zip › elife_poa_e45105_Figure_1_figure_supplement_3.pdf]
